# Supplementary material for: Reuse of Food Waste: The Chemical Composition and Health Properties of Pomelo (Citrus maxima) Cultivar Essential Oils
Source: MDPI journal article supplement (doi:10.3390/molecules27103273), 2022-05-19
Supplement: s1 [file s1]

## Supplementary material

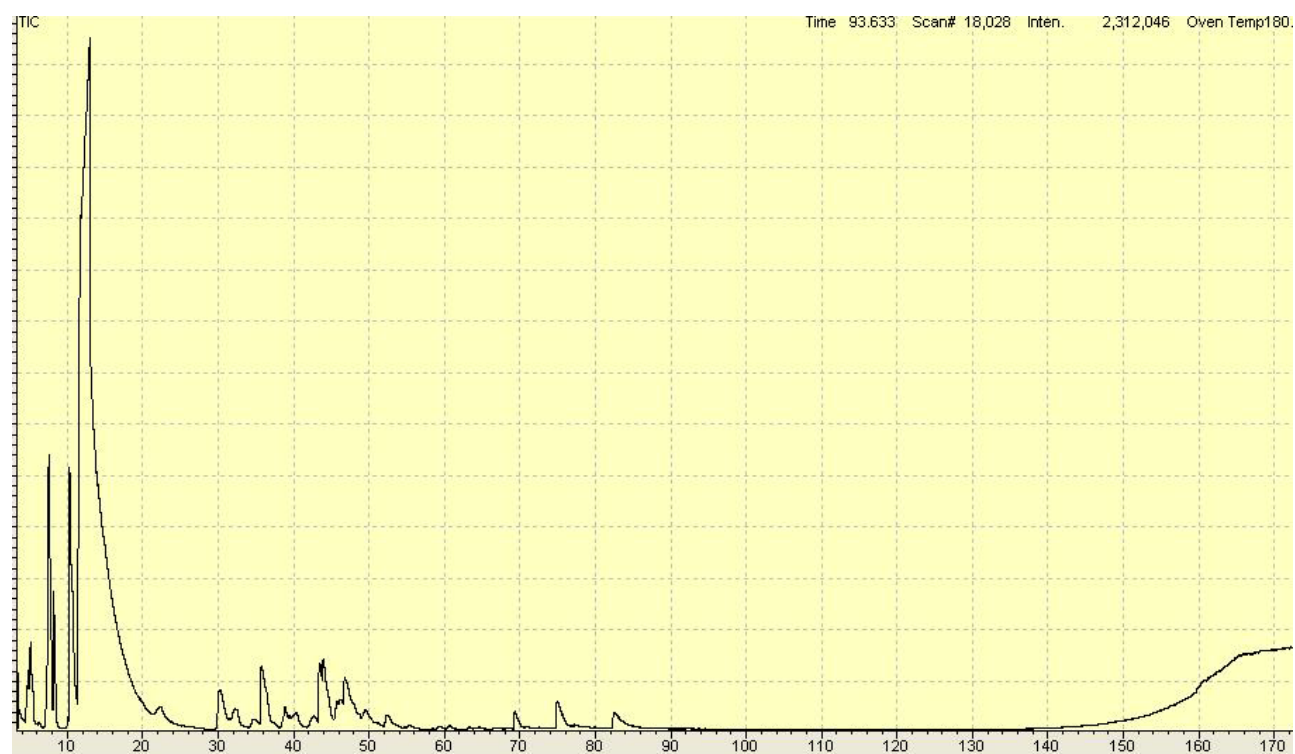

**Figure S1:** Chromatogram obtained by injection of *C. maxima* 'Chadock' (P1) EO.

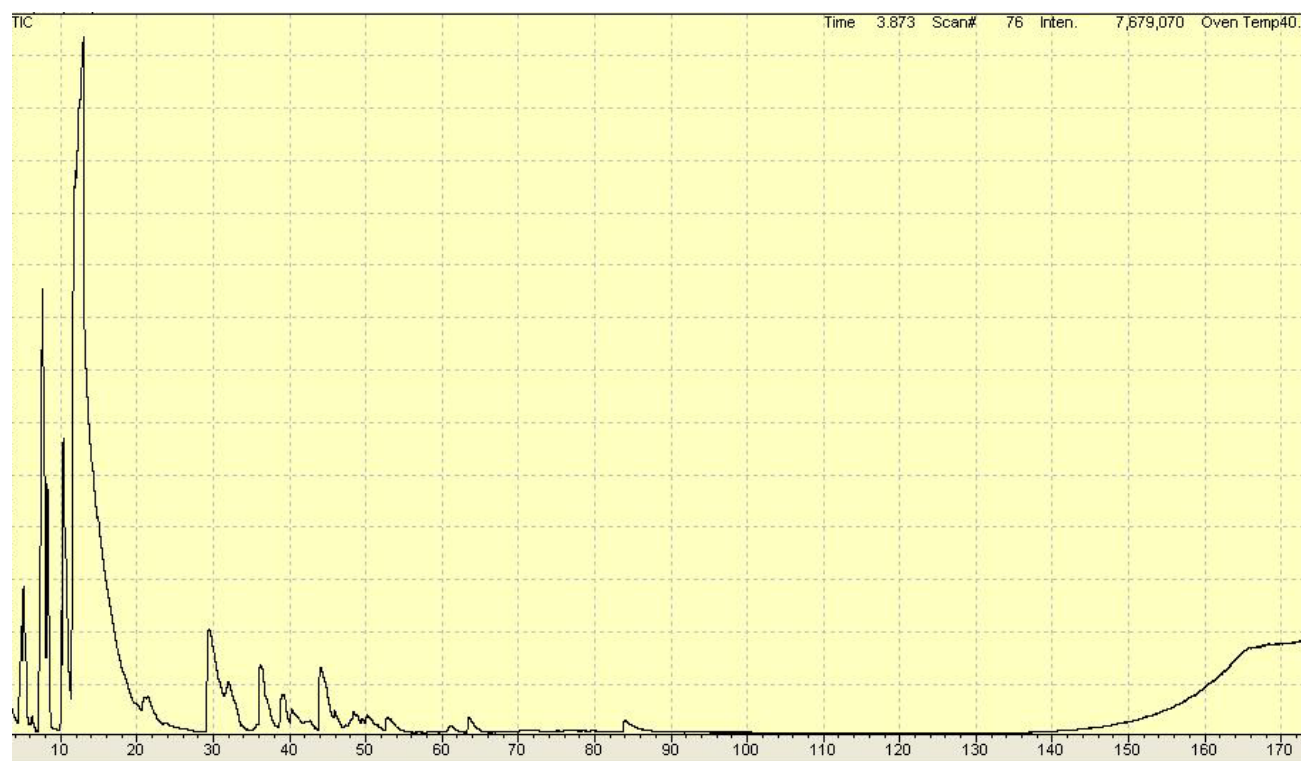

**Figure S2.** Chromatogram obtained by injection of *C. maxima* 'Maxima' (P2) EO.

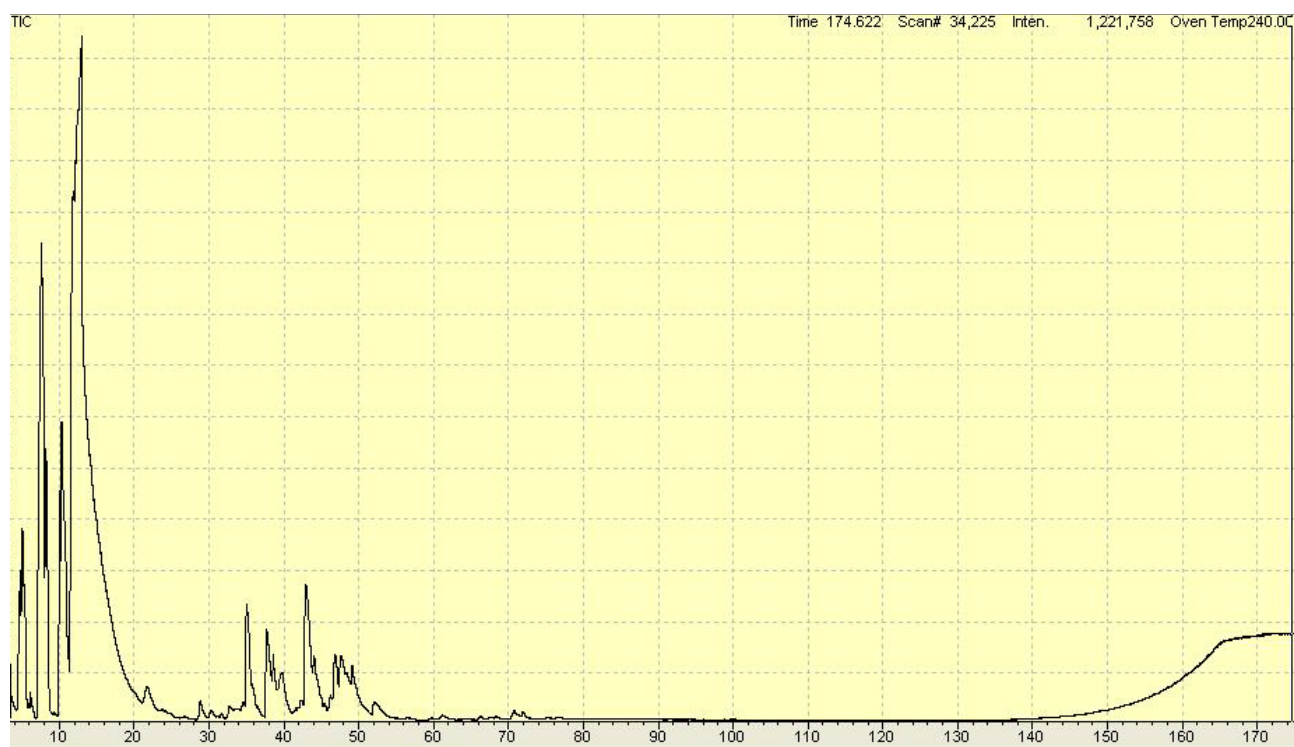

**Figure S3.** Chromatogram obtained by injection of *C. maxima* 'Pyriformis' (P3) EO.

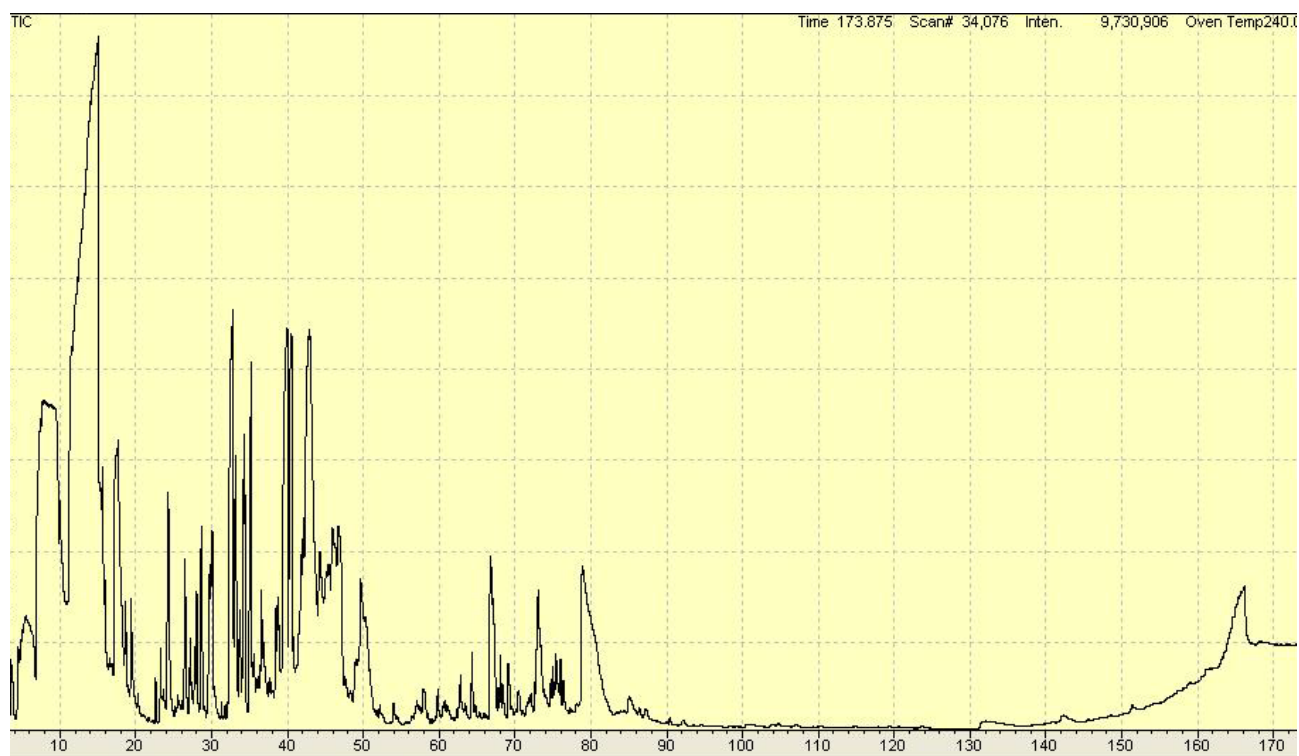

**Figure S4.** Chromatogram obtained by injection of *C. maxima* 'Terracciani' (P4) EO.

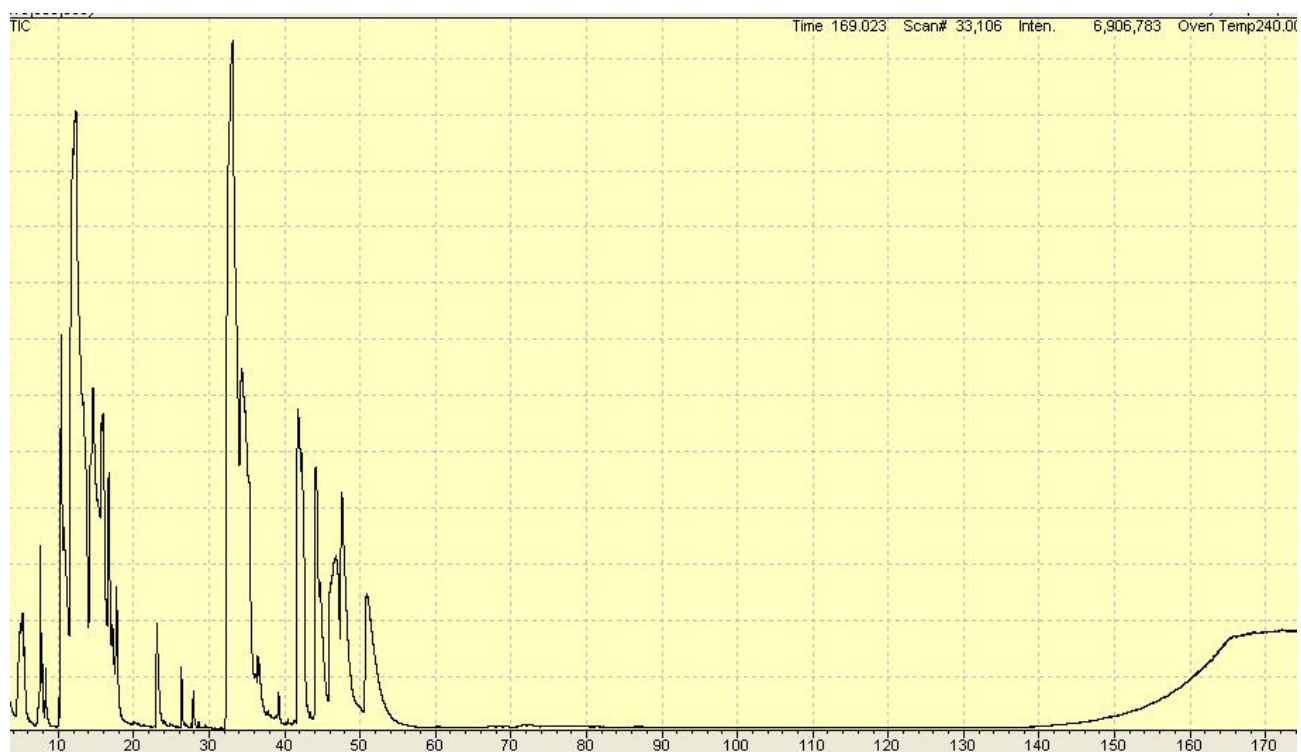

**Figure S5.** Chromatogram obtained by injection of *C. maxima* 'Todarii' (P5) EO.
